# Supplementary material for: Racial Disparities in COVID-19 Outcomes Among Black and White Patients With Cancer
Source: PubMed Central journal article supplement (PMC8961318; doi:10.1001/jamanetworkopen.2022.4304), 2022-03-28
Supplement: jamanetwopen-e224304-s002.pdf [file jamanetwopen-e224304-s002.pdf]

\*Indicates required information. Only first name, last name, and suffix will appear in PubMed.

| <b>*Group Name(s): The COVID-19 and Cancer Consortium (CCC19)</b> |                    |                              |                  |                                                                                                       |                                          |                                                         |                                                                                            |
|-------------------------------------------------------------------|--------------------|------------------------------|------------------|-------------------------------------------------------------------------------------------------------|------------------------------------------|---------------------------------------------------------|--------------------------------------------------------------------------------------------|
| <b>*First Name and Middle Initial(s)</b>                          | <b>*Last Name</b>  | <b>*Suffix (eg, Jr, III)</b> | Academic Degrees | Institution                                                                                           | Location (city, state/province, country) | Role or Contribution, eg, chair, principal investigator | Group (if more than 1 Group listed in the byline) and/or Subgroup (eg, Steering Committee) |
| Balazs                                                            | Halmos             |                              | MD               | Albert Einstein College of Medicine, Montefiore Medical Center                                        | Bronx, NY                                | Participating site Co-principal Investigator            | CCC19                                                                                      |
| Amit K.                                                           | Verma              |                              | MBBS             | Albert Einstein College of Medicine, Montefiore Medical Center                                        | Bronx, NY                                | Participating site Co-principal Investigator            | CCC19                                                                                      |
| Benjamin A.                                                       | Gartrell           |                              | MD               | Albert Einstein College of Medicine, Montefiore Medical Center                                        | Bronx, NY                                | Participating site Co-Investigator                      | CCC19                                                                                      |
| Sanjay                                                            | Goel               |                              | MBBS             | Albert Einstein College of Medicine, Montefiore Medical Center                                        | Bronx, NY                                | Participating site Co-Investigator                      | CCC19                                                                                      |
| Nitin                                                             | Ohri               |                              | MD               | Albert Einstein College of Medicine, Montefiore Medical Center                                        | Bronx, NY                                | Participating site Co-Investigator                      | CCC19                                                                                      |
| R.Alejandro                                                       | Sica               |                              | MD               | Albert Einstein College of Medicine, Montefiore Medical Center                                        | Bronx, NY                                | Participating site Co-Investigator                      | CCC19                                                                                      |
| Astha                                                             | Thakkar            |                              | MD               | Albert Einstein College of Medicine, Montefiore Medical Center                                        | Bronx, NY                                | Participating site Co-Investigator                      | CCC19                                                                                      |
| Keith E.                                                          | Stockerl-Goldstein |                              | MD               | Alvin J. Siteman Cancer Center at Washington University School of Medicine and Barnes-Jewish Hospital | St. Louis, MO                            | Participating site principal Investigator               | CCC19                                                                                      |
| Omar                                                              | Butt               |                              | MD, PhD          | Alvin J. Siteman Cancer Center at Washington University School of Medicine and Barnes-Jewish Hospital | St. Louis, MO                            | Participating site Co-Investigator                      | CCC19                                                                                      |

## Supplemental Online Content: Nonauthor Collaborators

\*Indicates required information. Only first name, last name, and suffix will appear in PubMed.

| *First Name and Middle Initial(s) | *Last Name     | *Suffix (eg, Jr, III) | Academic Degrees | Institution                                                                                           | Location (city, state/province, country) | Role or Contribution, eg, chair, principal investigator              | Group (if more than 1 Group listed in the byline) and/or Subgroup (eg, Steering Committee) |
|-----------------------------------|----------------|-----------------------|------------------|-------------------------------------------------------------------------------------------------------|------------------------------------------|----------------------------------------------------------------------|--------------------------------------------------------------------------------------------|
| Jian L.                           | Campian        |                       | MD, PhD          | Alvin J. Siteman Cancer Center at Washington University School of Medicine and Barnes-Jewish Hospital | St. Louis, MO                            | Participating site Co-Investigator                                   | CCC19                                                                                      |
| Mark A.                           | Fiala          |                       | MSW              | Alvin J. Siteman Cancer Center at Washington University School of Medicine and Barnes-Jewish Hospital | St. Louis, MO                            | Participating site Co-Investigator                                   | CCC19                                                                                      |
| Ryan                              | Monahan        |                       | MBA              | Alvin J. Siteman Cancer Center at Washington University School of Medicine and Barnes-Jewish Hospital | St. Louis, MO                            | Participating site Co-Investigator                                   | CCC19                                                                                      |
| Alice Y.                          | Zhou           |                       | MD, PhD          | Alvin J. Siteman Cancer Center at Washington University School of Medicine and Barnes-Jewish Hospital | St. Louis, MO                            | Participating site Co-Investigator                                   | CCC19                                                                                      |
| Jaymin M.                         | Patel          |                       | MD               | Beth Israel Deaconess Medical Center                                                                  | Boston, MA                               | Participating site principal Investigator                            | CCC19                                                                                      |
| Andrew J.                         | Piper-Vallillo |                       | MD               | Beth Israel Deaconess Medical Center                                                                  | Boston, MA                               | Participating site Co-Investigator                                   | CCC19                                                                                      |
| Poorva                            | Bindal         |                       | MBBS             | Beth Israel Deaconess Medical Center                                                                  | Boston, MA                               | Participating site Co-Investigator                                   | CCC19                                                                                      |
| Michael A.                        | Thompson       |                       | MD, PhD, FASCO   | Aurora Cancer Care, Advocate Aurora Health                                                            | Milwaukee, WI                            | Participating site principal Investigator; Steering Committee Member | CCC19                                                                                      |
| Pamela                            | Bohachek       |                       | RN               | Aurora Cancer Care, Advocate Aurora Health                                                            | Milwaukee, WI                            | Participating site Co-Investigator                                   | CCC19                                                                                      |
| Daniel                            | Mundt          |                       | MD               | Aurora Cancer Care, Advocate Aurora Health                                                            | Milwaukee, WI                            | Participating site Co-Investigator                                   | CCC19                                                                                      |

## Supplemental Online Content: Nonauthor Collaborators

\*Indicates required information. Only first name, last name, and suffix will appear in PubMed.

| *First Name and Middle Initial(s) | *Last Name     | *Suffix (eg, Jr, III) | Academic Degrees | Institution                                               | Location (city, state/province, country) | Role or Contribution, eg, chair, principal investigator       | Group (if more than 1 Group listed in the byline) and/or Subgroup (eg, Steering Committee) |
|-----------------------------------|----------------|-----------------------|------------------|-----------------------------------------------------------|------------------------------------------|---------------------------------------------------------------|--------------------------------------------------------------------------------------------|
| Mitrianna                         | Streckfuss     |                       | MPH              | Aurora Cancer Care, Advocate Aurora Health                | Milwaukee, WI                            | Participating site Co-Investigator                            | CCC19                                                                                      |
| Eyob                              | Tadesse        |                       | MD               | Aurora Cancer Care, Advocate Aurora Health                | Milwaukee, WI                            | Participating site Co-Investigator                            | CCC19                                                                                      |
| Philip E.                         | Lammers        |                       | MD, MSCI         | Baptist Cancer Center                                     | Memphis, TN                              | Participating site principal Investigator                     | CCC19                                                                                      |
| Orestis A.                        | Panagiotou     |                       | MD, PhD          | Brown University and Lifespan Cancer Institute            | Providence, RI                           | Participating site principal Investigator                     | CCC19                                                                                      |
| Pamela C.                         | Egan           |                       | MD               | Brown University and Lifespan Cancer Institute            | Providence, RI                           | Participating site Co-Investigator                            | CCC19                                                                                      |
| Dimitrios                         | Farmakiotis    |                       | MD, FACP, FIDSA  | Brown University and Lifespan Cancer Institute            | Providence, RI                           | Participating site Co-Investigator; Steering Committee Member | CCC19                                                                                      |
| Hina                              | Khan           |                       | MD               | Brown University and Lifespan Cancer Institute            | Providence, RI                           | Participating site Co-Investigator                            | CCC19                                                                                      |
| Adam J.                           | Olszewski      |                       | MD               | Brown University and Lifespan Cancer Institute            | Providence, RI                           | Participating site Co-Investigator                            | CCC19                                                                                      |
| Arturo                            | Loaiza-Bonilla |                       | MD, MSeD, FACP   | Cancer Treatment Centers of America                       | AZ/GA/IL/OK/PA                           | Participating site principal Investigator                     | CCC19                                                                                      |
| Salvatore A.                      | Del Prete      |                       | MD               | Carl & Dorothy Bennett Cancer Center at Stamford Hospital | Stamford, CT                             | Participating site principal Investigator                     | CCC19                                                                                      |
| Anne H.                           | Angevine       |                       | MD               | Carl & Dorothy Bennett Cancer Center at Stamford Hospital | Stamford, CT                             | Participating site Co-Investigator                            | CCC19                                                                                      |
| Michael H.                        | Bar            |                       | MD, FACP         | Carl & Dorothy Bennett Cancer Center at Stamford Hospital | Stamford, CT                             | Participating site Co-Investigator                            | CCC19                                                                                      |
| Anthony P.                        | Gulati         |                       | MD               | Carl & Dorothy Bennett Cancer Center at Stamford Hospital | Stamford, CT                             | Participating site Co-Investigator                            | CCC19                                                                                      |
| K. M.                             | Steve Lo       |                       | MD               | Carl & Dorothy Bennett Cancer Center at Stamford Hospital | Stamford, CT                             | Participating site Co-Investigator                            | CCC19                                                                                      |

## Supplemental Online Content: Nonauthor Collaborators

\*Indicates required information. Only first name, last name, and suffix will appear in PubMed.

| *First Name and Middle Initial(s) | *Last Name      | *Suffix (eg, Jr, III) | Academic Degrees | Institution                                                                              | Location (city, state/province, country) | Role or Contribution, eg, chair, principal investigator | Group (if more than 1 Group listed in the byline) and/or Subgroup (eg, Steering Committee) |
|-----------------------------------|-----------------|-----------------------|------------------|------------------------------------------------------------------------------------------|------------------------------------------|---------------------------------------------------------|--------------------------------------------------------------------------------------------|
| Jamie                             | Stratton        |                       | MD               | Carl & Dorothy Bennett Cancer Center at Stamford Hospital                                | Stamford, CT                             | Participating site Co-Investigator                      | CCC19                                                                                      |
| Paul L.                           | Weinstein       |                       | MD               | Carl & Dorothy Bennett Cancer Center at Stamford Hospital                                | Stamford, CT                             | Participating site Co-Investigator                      | CCC19                                                                                      |
| Paolo F.                          | Caimi           |                       | MD               | Case Comprehensive Cancer Center at Case Western Reserve University/University Hospitals | Cleveland, OH                            | Participating site principal Investigator               | CCC19                                                                                      |
| Jill S.                           | Barnholtz-Sloan |                       | PhD              | Case Comprehensive Cancer Center at Case Western Reserve University/University Hospitals | Cleveland, OH                            | Participating site Co-Investigator                      | CCC19                                                                                      |
| Jorge A.                          | Garcia          |                       | MD, FACP         | Case Comprehensive Cancer Center at Case Western Reserve University/University Hospitals | Cleveland, OH                            | Participating site Co-Investigator                      | CCC19                                                                                      |
| John M.                           | Nakayama        |                       | MD               | Case Comprehensive Cancer Center at Case Western Reserve University/University Hospitals | Cleveland, OH                            | Participating site Co-Investigator                      | CCC19                                                                                      |
| Shilpa                            | Gupta           |                       | MD               | Cleveland Clinic                                                                         | Cleveland, OH                            | Participating site principal Investigator               | CCC19                                                                                      |
| Nathan A.                         | Pennell         |                       | MD, PhD, FASCO   | Cleveland Clinic                                                                         | Cleveland, OH                            | Participating site Co-Investigator                      | CCC19                                                                                      |
| Manmeet S.                        | Ahluwalia       |                       | MD, FACP         | Cleveland Clinic                                                                         | Cleveland, OH                            | Participating site Co-Investigator                      | CCC19                                                                                      |
| Scott J.                          | Dawsey          |                       | MD               | Cleveland Clinic                                                                         | Cleveland, OH                            | Participating site Co-Investigator                      | CCC19                                                                                      |
| Christopher A.                    | Lemmon          |                       | MD               | Cleveland Clinic                                                                         | Cleveland, OH                            | Participating site Co-Investigator                      | CCC19                                                                                      |
| Amanda                            | Nizam           |                       | MD               | Cleveland Clinic                                                                         | Cleveland, OH                            | Participating site Co-Investigator                      | CCC19                                                                                      |
| Claire                            | Hoppenot        |                       | MD               | Dan L Duncan Comprehensive Cancer Center at Baylor College of Medicine                   | Houston, TX                              | Participating site Co-principal Investigator            | CCC19                                                                                      |

## Supplemental Online Content: Nonauthor Collaborators

\*Indicates required information. Only first name, last name, and suffix will appear in PubMed.

| *First Name and Middle Initial(s) | *Last Name | *Suffix (eg, Jr, III) | Academic Degrees | Institution                                                            | Location (city, state/province, country) | Role or Contribution, eg, chair, principal investigator | Group (if more than 1 Group listed in the byline) and/or Subgroup (eg, Steering Committee) |
|-----------------------------------|------------|-----------------------|------------------|------------------------------------------------------------------------|------------------------------------------|---------------------------------------------------------|--------------------------------------------------------------------------------------------|
| Ang                               | Li         |                       | MD, MS           | Dan L Duncan Comprehensive Cancer Center at Baylor College of Medicine | Houston, TX                              | Participating site Co-principal Investigator            | CCC19                                                                                      |
| Ziad                              | Bakouny    |                       | MD, MSc          | Dana-Farber Cancer Institute                                           | Boston, MA                               | Participating site Co-Investigator                      | CCC19                                                                                      |
| Gabrielle                         | Bouchard   |                       | BS               | Dana-Farber Cancer Institute                                           | Boston, MA                               | Participating site Co-Investigator                      | CCC19                                                                                      |
| Fiona J.                          | Busser     |                       | BA               | Dana-Farber Cancer Institute                                           | Boston, MA                               | Participating site Co-Investigator                      | CCC19                                                                                      |
| Jean M.                           | Connors    |                       | MD               | Dana-Farber Cancer Institute                                           | Boston, MA                               | Participating site Co-Investigator                      | CCC19                                                                                      |
| Catherine R.                      | Curran     |                       | BA               | Dana-Farber Cancer Institute                                           | Boston, MA                               | Participating site Co-Investigator                      | CCC19                                                                                      |
| George D.                         | Demetri    |                       | MD, FASCO        | Dana-Farber Cancer Institute                                           | Boston, MA                               | Participating site Co-Investigator                      | CCC19                                                                                      |
| Antonio                           | Giordano   |                       | MD, PhD          | Dana-Farber Cancer Institute                                           | Boston, MA                               | Participating site Co-Investigator                      | CCC19                                                                                      |
| Kaitlin                           | Kelleher   |                       | BA               | Dana-Farber Cancer Institute                                           | Boston, MA                               | Participating site Co-Investigator                      | CCC19                                                                                      |
| Anju                              | Nohria     |                       | MD               | Dana-Farber Cancer Institute                                           | Boston, MA                               | Participating site Co-Investigator                      | CCC19                                                                                      |
| Grace                             | Shaw       |                       | BA               | Dana-Farber Cancer Institute                                           | Boston, MA                               | Participating site Co-Investigator                      | CCC19                                                                                      |
| Eli                               | Van Allen  |                       | MD               | Dana-Farber Cancer Institute                                           | Boston, MA                               | Participating site Co-Investigator                      | CCC19                                                                                      |
| Pier                              | Vitale     |                       |                  | Dana-Farber Cancer Institute                                           | Boston, MA                               | Participating site Co-Investigator                      | CCC19                                                                                      |
| Vincent                           | Xu         |                       | MD               | Dana-Farber Cancer Institute                                           | Boston, MA                               | Participating site Co-Investigator                      | CCC19                                                                                      |
| Rebecca L.                        | Zon        |                       | MD               | Dana-Farber Cancer Institute                                           | Boston, MA                               | Participating site Co-Investigator                      | CCC19                                                                                      |

## Supplemental Online Content: Nonauthor Collaborators

\*Indicates required information. Only first name, last name, and suffix will appear in PubMed.

| *First Name and Middle Initial(s) | *Last Name | *Suffix (eg, Jr, III) | Academic Degrees     | Institution                                                                                  | Location (city, state/province, country) | Role or Contribution, eg, chair, principal investigator       | Group (if more than 1 Group listed in the byline) and/or Subgroup (eg, Steering Committee) |
|-----------------------------------|------------|-----------------------|----------------------|----------------------------------------------------------------------------------------------|------------------------------------------|---------------------------------------------------------------|--------------------------------------------------------------------------------------------|
| Tian                              | Zhang      |                       | MD, MHS              | Duke Cancer Institute at Duke University Medical Center                                      | Durham, NC                               | Participating site principal Investigator                     | CCC19                                                                                      |
| Susan                             | Halabi     |                       | PhD, FASCO           | Duke Cancer Institute at Duke University Medical Center                                      | Durham, NC                               | Participating site Co-Investigator                            | CCC19                                                                                      |
| John C.                           | Leighton   | Jr.                   | MD, FACP             | Einstein Healthcare Network                                                                  | Philadelphia, PA                         | Participating site principal Investigator                     | CCC19                                                                                      |
| Gary H.                           | Lyman      |                       | MD, MPH, FASCO, FRCP | Fred Hutchinson Cancer Research Center/University of Washington/Seattle Cancer Care Alliance | Seattle, WA                              | Participating site principal Investigator                     | CCC19                                                                                      |
| Jerome J.                         | Graber     |                       | MD, MPH              | Fred Hutchinson Cancer Research Center/University of Washington/Seattle Cancer Care Alliance | Seattle, WA                              | Participating site Co-Investigator                            | CCC19                                                                                      |
| Petros                            | Grivas     |                       | MD, PhD              | Fred Hutchinson Cancer Research Center/University of Washington/Seattle Cancer Care Alliance | Seattle, WA                              | Participating site Co-Investigator; Steering Committee Member | CCC19                                                                                      |
| Ali Raza                          | Khaki      |                       | MD                   | Fred Hutchinson Cancer Research Center/University of Washington/Seattle Cancer Care Alliance | Seattle, WA                              | Participating site Co-Investigator                            | CCC19                                                                                      |
| Elizabeth T.                      | Loggers    |                       | MD, PhD              | Fred Hutchinson Cancer Research Center/University of Washington/Seattle Cancer Care Alliance | Seattle, WA                              | Participating site Co-Investigator                            | CCC19                                                                                      |
| Ryan C.                           | Lynch      |                       | MD                   | Fred Hutchinson Cancer Research Center/University of Washington/Seattle Cancer Care Alliance | Seattle, WA                              | Participating site Co-Investigator                            | CCC19                                                                                      |

## Supplemental Online Content: Nonauthor Collaborators

\*Indicates required information. Only first name, last name, and suffix will appear in PubMed.

| *First Name and Middle Initial(s) | *Last Name | *Suffix (eg, Jr, III) | Academic Degrees | Institution                                                                                  | Location (city, state/province, country) | Role or Contribution, eg, chair, principal investigator | Group (if more than 1 Group listed in the byline) and/or Subgroup (eg, Steering Committee) |
|-----------------------------------|------------|-----------------------|------------------|----------------------------------------------------------------------------------------------|------------------------------------------|---------------------------------------------------------|--------------------------------------------------------------------------------------------|
| Elizabeth S.                      | Nakasone   |                       | MD, PhD          | Fred Hutchinson Cancer Research Center/University of Washington/Seattle Cancer Care Alliance | Seattle, WA                              | Participating site Co-Investigator                      | CCC19                                                                                      |
| Michael T.                        | Schweizer  |                       | MD               | Fred Hutchinson Cancer Research Center/University of Washington/Seattle Cancer Care Alliance | Seattle, WA                              | Participating site Co-Investigator                      | CCC19                                                                                      |
| Lisa                              | Tachiki    |                       | MD               | Fred Hutchinson Cancer Research Center/University of Washington/Seattle Cancer Care Alliance | Seattle, WA                              | Participating site Co-Investigator                      | CCC19                                                                                      |
| Shaveta                           | Vinayak    |                       | MD, MS           | Fred Hutchinson Cancer Research Center/University of Washington/Seattle Cancer Care Alliance | Seattle, WA                              | Participating site Co-Investigator                      | CCC19                                                                                      |
| Michael J.                        | Wagner     |                       | MD               | Fred Hutchinson Cancer Research Center/University of Washington/Seattle Cancer Care Alliance | Seattle, WA                              | Participating site Co-Investigator                      | CCC19                                                                                      |
| Albert                            | Yeh        |                       | MD               | Fred Hutchinson Cancer Research Center/University of Washington/Seattle Cancer Care Alliance | Seattle, WA                              | Participating site Co-Investigator                      | CCC19                                                                                      |
| Minh-Phuong                       | Huynh-Le   |                       | MD, MAS          | George Washington University                                                                 | Washington, DC                           | Participating site Co-principal Investigator            | CCC19                                                                                      |
| Lori J.                           | Rosenstein |                       | MD               | Gundersen Health System                                                                      | WI, USA                                  | Participating site principal Investigator               | CCC19                                                                                      |
| Peter Paul                        | Yu         |                       | MD, FACP, FASCO  | Hartford HealthCare Cancer Institute                                                         | Hartford, CT                             | Participating site principal Investigator               | CCC19                                                                                      |

## Supplemental Online Content: Nonauthor Collaborators

\*Indicates required information. Only first name, last name, and suffix will appear in PubMed.

| *First Name and Middle Initial(s) | *Last Name | *Suffix (eg, Jr, III) | Academic Degrees | Institution                                                                             | Location (city, state/province, country) | Role or Contribution, eg, chair, principal investigator | Group (if more than 1 Group listed in the byline) and/or Subgroup (eg, Steering Committee) |
|-----------------------------------|------------|-----------------------|------------------|-----------------------------------------------------------------------------------------|------------------------------------------|---------------------------------------------------------|--------------------------------------------------------------------------------------------|
| Jessica M.                        | Clement    |                       | MD               | Hartford HealthCare Cancer Institute                                                    | Hartford, CT                             | Participating site Co-Investigator                      | CCC19                                                                                      |
| Ahmad                             | Daher      |                       | MD               | Hartford HealthCare Cancer Institute                                                    | Hartford, CT                             | Participating site Co-Investigator                      | CCC19                                                                                      |
| Mark                              | Dailey     |                       | MD               | Hartford HealthCare Cancer Institute                                                    | Hartford, CT                             | Participating site Co-Investigator                      | CCC19                                                                                      |
| Rawad                             | Elias      |                       | MD               | Hartford HealthCare Cancer Institute                                                    | Hartford, CT                             | Participating site Co-Investigator                      | CCC19                                                                                      |
| Asha                              | Jayaraj    |                       | MD               | Hartford HealthCare Cancer Institute                                                    | Hartford, CT                             | Participating site Co-Investigator                      | CCC19                                                                                      |
| Emily                             | Hsu        |                       | MD               | Hartford HealthCare Cancer Institute                                                    | Hartford, CT                             | Participating site Co-Investigator                      | CCC19                                                                                      |
| Alvaro G.                         | Menendez   |                       | MD               | Hartford HealthCare Cancer Institute                                                    | Hartford, CT                             | Participating site Co-Investigator                      | CCC19                                                                                      |
| Joerg                             | Rathmann   |                       | MD               | Hartford HealthCare Cancer Institute                                                    | Hartford, CT                             | Participating site Co-Investigator                      | CCC19                                                                                      |
| Shirish M.                        | Gadgeel    |                       | MD               | Henry Ford Cancer Institute, Henry Ford HosParticipating site principal Investigatortal | Detroit, MI                              | Participating site Co-Investigator                      | CCC19                                                                                      |
| Dawn                              | Hershman   |                       | MD, MS, FASCO    | Herbert Irving Comprehensive Cancer Center at Columbia University                       | New York, NY                             | Participating site Co-principal Investigator            | CCC19                                                                                      |
| Melissa K.                        | Accordino  |                       | MD, MS           | Herbert Irving Comprehensive Cancer Center at Columbia University                       | New York, NY                             | Participating site Co-Investigator                      | CCC19                                                                                      |
| Divaya                            | Bhutani    |                       | MD               | Herbert Irving Comprehensive Cancer Center at Columbia University                       | New York, NY                             | Participating site Co-Investigator                      | CCC19                                                                                      |
| Gary K.                           | Schwartz   |                       | MD               | Herbert Irving Comprehensive Cancer Center at Columbia University                       | New York, NY                             | Participating site Co-Investigator                      | CCC19                                                                                      |



## Supplemental Online Content: Nonauthor Collaborators

\*Indicates required information. Only first name, last name, and suffix will appear in PubMed.

| *First Name and Middle Initial(s) | *Last Name | *Suffix (eg, Jr, III) | Academic Degrees | Institution                                                        | Location (city, state/province, country) | Role or Contribution, eg, chair, principal investigator | Group (if more than 1 Group listed in the byline) and/or Subgroup (eg, Steering Committee) |
|-----------------------------------|------------|-----------------------|------------------|--------------------------------------------------------------------|------------------------------------------|---------------------------------------------------------|--------------------------------------------------------------------------------------------|
| Daniel Y.                         | Reuben     |                       | MD, MS           | Hollings Cancer Center at the Medical University of South Carolina | Charleston, SC                           | Participating site principal Investigator               | CCC19                                                                                      |
| Sarah                             | Mushtaq    |                       | MD               | Hollings Cancer Center at the Medical University of South Carolina | Charleston, SC                           | Participating site Co-Investigator                      | CCC19                                                                                      |
| Eric H.                           | Bernicker  |                       | MD               | Houston Methodist Cancer Center                                    | Houston, TX                              | Participating site principal Investigator               | CCC19                                                                                      |
| John                              | Deeken     |                       | MD               | Inova Schar Cancer Institute                                       | Fairfax, VA                              | Participating site principal Investigator               | CCC19                                                                                      |
| Danielle                          | Shafer     |                       | DO               | Inova Schar Cancer Institute                                       | Fairfax, VA                              | Participating site Co-Investigator                      | CCC19                                                                                      |
| Mark A.                           | Lewis      |                       | MD               | Intermountain Health Care                                          | Salt Lake City, UT                       | Participating site Co-principal Investigator            | CCC19                                                                                      |
| Terence D.                        | Rhodes     |                       | MD, PhD          | Intermountain Health Care                                          | Salt Lake City, UT                       | Participating site Co-principal Investigator            | CCC19                                                                                      |
| David M.                          | Gill       |                       | MD               | Intermountain Health Care                                          | Salt Lake City, UT                       | Participating site Co-Investigator                      | CCC19                                                                                      |
| Clarke A.                         | Low        |                       | MD               | Intermountain Health Care                                          | Salt Lake City, UT                       | Participating site Co-Investigator                      | CCC19                                                                                      |
| Sandeep H.                        | Mashru     |                       | MD               | Kaiser Permanente Northwest                                        | OR/WA                                    | Participating site principal Investigator               | CCC19                                                                                      |
| Abdul-Hai                         | Mansoor    |                       | MD               | Kaiser Permanente Northwest                                        | OR/WA                                    | Participating site Co-Investigator                      | CCC19                                                                                      |
| Howard A.                         | Zaren      |                       | MD, FACS         | Lewis Cancer & Research Pavilion @ St. Joseph's/Candler            | Savannah, GA                             | Participating site principal Investigator               | CCC19                                                                                      |
| Stephanie J.                      | Smith      |                       | RN, MSN, OCN     | Lewis Cancer & Research Pavilion @ St. Joseph's/Candler            | Savannah, GA                             | Participating site Co-Investigator                      | CCC19                                                                                      |
| Gayathri                          | Nagaraj    |                       | MD               | Loma Linda University Cancer Center                                | Loma Linda, CA                           | Participating site principal Investigator               | CCC19                                                                                      |

## Supplemental Online Content: Nonauthor Collaborators

\*Indicates required information. Only first name, last name, and suffix will appear in PubMed.

| *First Name and Middle Initial(s) | *Last Name | *Suffix (eg, Jr, III) | Academic Degrees | Institution                                          | Location (city, state/province, country) | Role or Contribution, eg, chair, principal investigator | Group (if more than 1 Group listed in the byline) and/or Subgroup (eg, Steering Committee) |
|-----------------------------------|------------|-----------------------|------------------|------------------------------------------------------|------------------------------------------|---------------------------------------------------------|--------------------------------------------------------------------------------------------|
| Mojtaba                           | Akhtari    |                       | MD               | Loma Linda University Cancer Center                  | Loma Linda, CA                           | Participating site Co-Investigator                      | CCC19                                                                                      |
| Eric                              | Lau        |                       | DO               | Loma Linda University Cancer Center                  | Loma Linda, CA                           | Participating site Co-Investigator                      | CCC19                                                                                      |
| Mark E.                           | Reeves     |                       | MD, PhD          | Loma Linda University Cancer Center                  | Loma Linda, CA                           | Participating site Co-Investigator                      | CCC19                                                                                      |
| Stephanie                         | Berg       |                       | DO               | Loyola University Medical Center                     | Maywood, IL                              | Participating site principal Investigator               | CCC19                                                                                      |
| Destry                            | Elms       |                       | MD               | Loyola University Medical Center                     | Maywood, IL                              | Participating site Co-Investigator                      | CCC19                                                                                      |
| Alicia K.                         | Morgans    |                       | MD, MPH          | Lurie Cancer Center at Northwestern University       | Chicago, IL                              | Participating site Co-principal Investigator            | CCC19                                                                                      |
| Firas H.                          | Wehbe      |                       | MD, PhD          | Lurie Cancer Center at Northwestern University       | Chicago, IL                              | Participating site Co-principal Investigator            | CCC19                                                                                      |
| Jessica                           | Altman     |                       | MD               | Lurie Cancer Center at Northwestern University       | Chicago, IL                              | Participating site Co-Investigator                      | CCC19                                                                                      |
| Michael                           | Gurley     |                       | BA               | Lurie Cancer Center at Northwestern University       | Chicago, IL                              | Participating site Co-Investigator                      | CCC19                                                                                      |
| Mary F.                           | Mulcahy    |                       | MD               | Lurie Cancer Center at Northwestern University       | Chicago, IL                              | Participating site Co-Investigator                      | CCC19                                                                                      |
| Eric B.                           | Durbin     |                       | DrPH, MS         | Markey Cancer Center at the University of Kentucky   | Lexington, KY                            | Participating site principal Investigator               | CCC19                                                                                      |
| Amit A.                           | Kulkarni   |                       | MD               | Masonic Cancer Center at the University of Minnesota | Minneapolis, MN,                         | Participating site principal Investigator               | CCC19                                                                                      |
| Heather H.                        | Nelson     |                       | PhD, MPH         | Masonic Cancer Center at the University of Minnesota | Minneapolis, MN,                         | Participating site Co-Investigator                      | CCC19                                                                                      |
| Surbhi                            | Shah       |                       | MD               | Masonic Cancer Center at the University of Minnesota | Minneapolis, MN,                         | Participating site Co-Investigator                      | CCC19                                                                                      |
| Rachel P.                         | Rosovsky   |                       | MD, MPH          | Massachusetts General Hospital Cancer Center         | Boston, MA                               | Participating site Co-principal Investigator            | CCC19                                                                                      |

## Supplemental Online Content: Nonauthor Collaborators

\*Indicates required information. Only first name, last name, and suffix will appear in PubMed.

| *First Name and Middle Initial(s) | *Last Name   | *Suffix (eg, Jr, III) | Academic Degrees | Institution                                                           | Location (city, state/province, country) | Role or Contribution, eg, chair, principal investigator | Group (if more than 1 Group listed in the byline) and/or Subgroup (eg, Steering Committee) |
|-----------------------------------|--------------|-----------------------|------------------|-----------------------------------------------------------------------|------------------------------------------|---------------------------------------------------------|--------------------------------------------------------------------------------------------|
| Kerry                             | Reynolds     |                       | MD               | Massachusetts General Hospital Cancer Center                          | Boston, MA                               | Participating site Co-principal Investigator            | CCC19                                                                                      |
| Aditya                            | Bardia       |                       | MD               | Massachusetts General Hospital Cancer Center                          | Boston, MA                               | Participating site Co-Investigator                      | CCC19                                                                                      |
| Genevieve                         | Boland       |                       | MD, PhD, FACS    | Massachusetts General Hospital Cancer Center                          | Boston, MA                               | Participating site Co-Investigator                      | CCC19                                                                                      |
| Justin                            | Gainor       |                       | MD               | Massachusetts General Hospital Cancer Center                          | Boston, MA                               | Participating site Co-Investigator                      | CCC19                                                                                      |
| Leyre                             | Zubiri       |                       | MD, PhD          | Massachusetts General Hospital Cancer Center                          | Boston, MA                               | Participating site Co-Investigator                      | CCC19                                                                                      |
| Thorvardur R.                     | Halfdanarson |                       | MD               | Mayo Clinic                                                           | AZ/FL/MN                                 | Participating site principal Investigator               | CCC19                                                                                      |
| Tanios                            | Bekaii-Saab  |                       | MD               | Mayo Clinic                                                           | AZ/FL/MN                                 | Participating site Co-Investigator                      | CCC19                                                                                      |
| Aakash                            | Desai        |                       | MD, MPH          | Mayo Clinic                                                           | AZ/FL/MN                                 | Participating site Co-Investigator                      | CCC19                                                                                      |
| Zhuoer                            | Xie          |                       | MD, MS           | Mayo Clinic                                                           | AZ/FL/MN                                 | Participating site Co-Investigator                      | CCC19                                                                                      |
| Ruben A.                          | Mesa         |                       | MD, FACP         | Mays Cancer Center at UT Health San Antonio MD Anderson Cancer Center | San Antonio, TX                          | Participating site principal Investigator               | CCC19                                                                                      |
| Mark                              | Bonnen       |                       | MD               | Mays Cancer Center at UT Health San Antonio MD Anderson Cancer Center | San Antonio, TX                          | Participating site Co-Investigator                      | CCC19                                                                                      |
| Daruka                            | Mahadevan    |                       | MD, PhD          | Mays Cancer Center at UT Health San Antonio MD Anderson Cancer Center | San Antonio, TX                          | Participating site Co-Investigator                      | CCC19                                                                                      |
| Amelie G.                         | Ramirez      |                       | DrPH, MPH        | Mays Cancer Center at UT Health San Antonio MD Anderson Cancer Center | San Antonio, TX                          | Participating site Co-Investigator                      | CCC19                                                                                      |

## Supplemental Online Content: Nonauthor Collaborators

\*Indicates required information. Only first name, last name, and suffix will appear in PubMed.

| *First Name and Middle Initial(s) | *Last Name | *Suffix (eg, Jr, III) | Academic Degrees   | Institution                                                                   | Location (city, state/province, country) | Role or Contribution, eg, chair, principal investigator | Group (if more than 1 Group listed in the byline) and/or Subgroup (eg, Steering Committee) |
|-----------------------------------|------------|-----------------------|--------------------|-------------------------------------------------------------------------------|------------------------------------------|---------------------------------------------------------|--------------------------------------------------------------------------------------------|
| Mary                              | Salazar    |                       | ANP                | Mays Cancer Center at UT Health San Antonio MD Anderson Cancer Center         | San Antonio, TX                          | Participating site Co-Investigator                      | CCC19                                                                                      |
| Pankil K.                         | Shah       |                       | MD, MSPH           | Mays Cancer Center at UT Health San Antonio MD Anderson Cancer Center         | San Antonio, TX                          | Participating site Co-Investigator                      | CCC19                                                                                      |
| Bryan                             | Faller     |                       | MD                 | Missouri Baptist Medical Center                                               | St. Louis, MO                            | Participating site principal Investigator               | CCC19                                                                                      |
| Rana R.                           | McKay      |                       | MD                 | Moore's Comprehensive Cancer Center at the University of California San Diego | La Jolla, CA                             | Participating site principal Investigator               | CCC19                                                                                      |
| Archana                           | Ajmera     |                       | MSN, ANP-BC, AOCNP | Moore's Comprehensive Cancer Center at the University of California San Diego | La Jolla, CA                             | Participating site Co-Investigator                      | CCC19                                                                                      |
| Angelo                            | Cabal      |                       | BS                 | Moore's Comprehensive Cancer Center at the University of California San Diego | La Jolla, CA                             | Participating site Co-Investigator                      | CCC19                                                                                      |
| Justin A.                         | Shaya      |                       | MD                 | Moore's Comprehensive Cancer Center at the University of California San Diego | La Jolla, CA                             | Participating site Co-Investigator                      | CCC19                                                                                      |
| Lisa B.                           | Weissmann  |                       | MD                 | Mount Auburn Hospital                                                         | Cambridge, MA                            | Participating site principal Investigator               | CCC19                                                                                      |
| Chinmay                           | Jani       |                       | MD                 | Mount Auburn Hospital                                                         | Cambridge, MA                            | Participating site Co-Investigator                      | CCC19                                                                                      |
| Jeanna                            | Knoble     |                       | MD                 | Mount Carmel Health System                                                    | Columbus, OH                             | Participating site principal Investigator               | CCC19                                                                                      |
| Mary Grace                        | Glance     |                       | RN                 | Mount Carmel Health System                                                    | Columbus, OH                             | Participating site Co-Investigator                      | CCC19                                                                                      |
| Cameron                           | Rink       |                       | PhD, MBA           | Mount Carmel Health System                                                    | Columbus, OH                             | Participating site Co-Investigator                      | CCC19                                                                                      |

## Supplemental Online Content: Nonauthor Collaborators

\*Indicates required information. Only first name, last name, and suffix will appear in PubMed.

| *First Name and Middle Initial(s) | *Last Name | *Suffix (eg, Jr, III) | Academic Degrees | Institution                                                                      | Location (city, state/province, country) | Role or Contribution, eg, chair, principal investigator | Group (if more than 1 Group listed in the byline) and/or Subgroup (eg, Steering Committee) |
|-----------------------------------|------------|-----------------------|------------------|----------------------------------------------------------------------------------|------------------------------------------|---------------------------------------------------------|--------------------------------------------------------------------------------------------|
| Karen                             | Stauffer   |                       | RN               | Mount Carmel Health System                                                       | Columbus, OH                             | Participating site Co-Investigator                      | CCC19                                                                                      |
| Rosemary                          | Zacks      |                       | RN               | Mount Carmel Health System                                                       | Columbus, OH                             | Participating site Co-Investigator                      | CCC19                                                                                      |
| Monika                            | Joshi      |                       | MD, MRCP         | Penn State Health/Penn State Cancer Institute/St. Joseph Cancer Center           | PA, USA                                  | Participating site principal Investigator               | CCC19                                                                                      |
| Harry                             | Menon      |                       | DO, MPH          | Penn State Health/Penn State Cancer Institute/St. Joseph Cancer Center           | PA, USA                                  | Participating site Co-Investigator                      | CCC19                                                                                      |
| Marc A.                           | Rovito     |                       | MD, FACP         | Penn State Health/Penn State Cancer Institute/St. Joseph Cancer Center           | PA, USA                                  | Participating site Co-Investigator                      | CCC19                                                                                      |
| Elizabeth A.                      | Griffiths  |                       | MD               | Roswell Park Comprehensive Cancer Center                                         | Buffalo, NY                              | Participating site principal Investigator               | CCC19                                                                                      |
| Amro                              | Elshoury   |                       | MBBCh            | Roswell Park Comprehensive Cancer Center                                         | Buffalo, NY                              | Participating site Co-Investigator                      | CCC19                                                                                      |
| Salma K.                          | Jabbour    |                       | MD               | Rutgers Cancer Institute of New Jersey at Rutgers Biomedical and Health Sciences | New Brunswick, NJ                        | Participating site principal Investigator               | CCC19                                                                                      |
| Mansi R.                          | Shah       |                       | MD               | Rutgers Cancer Institute of New Jersey at Rutgers Biomedical and Health Sciences | New Brunswick, NJ                        | Participating site Co-Investigator                      | CCC19                                                                                      |
| Babar                             | Bashir     |                       | MD, MS           | Sidney Kimmel Cancer Center at Thomas Jefferson University                       | Philadelphia, PA                         | Participating site principal Investigator               | CCC19                                                                                      |
| Christopher                       | McNair     |                       | PhD              | Sidney Kimmel Cancer Center at Thomas Jefferson University                       | Philadelphia, PA                         | Participating site Co-Investigator                      | CCC19                                                                                      |
| Sana Z.                           | Mahmood    |                       | BA, BS           | Sidney Kimmel Cancer Center at Thomas Jefferson University                       | Philadelphia, PA                         | Participating site Co-Investigator                      | CCC19                                                                                      |
| Vasil                             | Mico       |                       | BS               | Sidney Kimmel Cancer Center at Thomas Jefferson University                       | Philadelphia, PA                         | Participating site Co-Investigator                      | CCC19                                                                                      |

## Supplemental Online Content: Nonauthor Collaborators

\*Indicates required information. Only first name, last name, and suffix will appear in PubMed.

| *First Name and Middle Initial(s) | *Last Name  | *Suffix (eg, Jr, III) | Academic Degrees | Institution                                                                            | Location (city, state/province, country) | Role or Contribution, eg, chair, principal investigator | Group (if more than 1 Group listed in the byline) and/or Subgroup (eg, Steering Committee) |
|-----------------------------------|-------------|-----------------------|------------------|----------------------------------------------------------------------------------------|------------------------------------------|---------------------------------------------------------|--------------------------------------------------------------------------------------------|
| Chaim                             | Miller      |                       | BA               | Sidney Kimmel Cancer Center at Thomas Jefferson University                             | Philadelphia, PA                         | Participating site Co-Investigator                      | CCC19                                                                                      |
| Andrea Verghese                   | Rivera      |                       | MD               | Sidney Kimmel Cancer Center at Thomas Jefferson University                             | Philadelphia, PA                         | Participating site Co-Investigator                      | CCC19                                                                                      |
| Daniel B.                         | Flora       |                       | MD, PharmD       | St. Elizabeth Healthcare                                                               | Edgewood, KY                             | Participating site principal Investigator               | CCC19                                                                                      |
| Barbara B.                        | Logan       |                       | MS               | St. Elizabeth Healthcare                                                               | Edgewood, KY                             | Participating site Co-Investigator                      | CCC19                                                                                      |
| Goetz                             | Kloecker    |                       | MD               | St. Elizabeth Healthcare                                                               | Edgewood, KY                             | Participating site Co-Investigator                      | CCC19                                                                                      |
| Chaitanya                         | Mandapakala |                       | MD               | St. Elizabeth Healthcare                                                               | Edgewood, KY                             | Participating site Co-Investigator                      | CCC19                                                                                      |
| Sumit A.                          | Shah        |                       | MD, MPH          | Stanford Cancer Institute at Stanford University                                       | Palo Alto, CA                            | Participating site principal Investigator               | CCC19                                                                                      |
| Elwyn C.                          | Cabebe      |                       | MD               | Stanford Cancer Institute at Stanford University                                       | Palo Alto, CA                            | Participating site Co-Investigator                      | CCC19                                                                                      |
| Michael J.                        | Glover      |                       | MD               | Stanford Cancer Institute at Stanford University                                       | Palo Alto, CA                            | Participating site Co-Investigator                      | CCC19                                                                                      |
| Alokkumar                         | Jha         |                       | PhD              | Stanford Cancer Institute at Stanford University                                       | Palo Alto, CA                            | Participating site Co-Investigator                      | CCC19                                                                                      |
| Lidia                             | Schapira    |                       | MD, FASCO        | Stanford Cancer Institute at Stanford University                                       | Palo Alto, CA                            | Participating site Co-Investigator                      | CCC19                                                                                      |
| Julie Tsu-Yu                      | Wu          |                       | MD, PhD          | Stanford Cancer Institute at Stanford University                                       | Palo Alto, CA                            | Participating site Co-Investigator                      | CCC19                                                                                      |
| Suki                              | Subbiah     |                       | MD               | Stanley S. Scott Cancer Center at LSU Health Sciences Center                           | New Orleans, LA                          | Participating site principal Investigator               | CCC19                                                                                      |
| Sanjay G.                         | Revankar    |                       | MD, FIDSA        | The Barbara Ann Karmanos Cancer Institute at Wayne State University School of Medicine | Detroit, MI                              | Participating site principal Investigator               | CCC19                                                                                      |
| Daniel G.                         | Stover      |                       | MD               | The Ohio State University Comprehensive Cancer Center                                  | Columbus, OH                             | Participating site principal Investigator               | CCC19                                                                                      |

## Supplemental Online Content: Nonauthor Collaborators

\*Indicates required information. Only first name, last name, and suffix will appear in PubMed.

| *First Name and Middle Initial(s) | *Last Name       | *Suffix (eg, Jr, III) | Academic Degrees | Institution                                           | Location (city, state/province, country) | Role or Contribution, eg, chair, principal investigator | Group (if more than 1 Group listed in the byline) and/or Subgroup (eg, Steering Committee) |
|-----------------------------------|------------------|-----------------------|------------------|-------------------------------------------------------|------------------------------------------|---------------------------------------------------------|--------------------------------------------------------------------------------------------|
| Daniel                            | Addison          |                       | MD               | The Ohio State University Comprehensive Cancer Center | Columbus, OH                             | Participating site Co-Investigator                      | CCC19                                                                                      |
| James L.                          | Chen             |                       | MD               | The Ohio State University Comprehensive Cancer Center | Columbus, OH                             | Participating site Co-Investigator                      | CCC19                                                                                      |
| Margaret E.                       | Gatti-Mays       |                       | MD               | The Ohio State University Comprehensive Cancer Center | Columbus, OH                             | Participating site Co-Investigator                      | CCC19                                                                                      |
| Sachin R.                         | Jhavar           |                       | MD               | The Ohio State University Comprehensive Cancer Center | Columbus, OH                             | Participating site Co-Investigator                      | CCC19                                                                                      |
| Vidhya                            | Karivedu         |                       | MBBS             | The Ohio State University Comprehensive Cancer Center | Columbus, OH                             | Participating site Co-Investigator                      | CCC19                                                                                      |
| Maryam B.                         | Lustberg         |                       | MD, MPH          | The Ohio State University Comprehensive Cancer Center | Columbus, OH                             | Participating site Co-Investigator                      | CCC19                                                                                      |
| Joshua D.                         | Palmer           |                       | MD               | The Ohio State University Comprehensive Cancer Center | Columbus, OH                             | Participating site Co-Investigator                      | CCC19                                                                                      |
| Clement                           | Pillainayagam    |                       | MD               | The Ohio State University Comprehensive Cancer Center | Columbus, OH                             | Participating site Co-Investigator                      | CCC19                                                                                      |
| Sarah                             | Wall             |                       | MD               | The Ohio State University Comprehensive Cancer Center | Columbus, OH                             | Participating site Co-Investigator                      | CCC19                                                                                      |
| Nicole                            | Williams         |                       | MD               | The Ohio State University Comprehensive Cancer Center | Columbus, OH                             | Participating site Co-Investigator                      | CCC19                                                                                      |
| Elizabeth                         | Wulff-Burchfield |                       | MD               | The University of Kansas Cancer Center                | Kansas City, KS                          | Participating site principal Investigator               | CCC19                                                                                      |
| Anup                              | Kasi             |                       | MD, MPH          | The University of Kansas Cancer Center                | Kansas City, KS                          | Participating site Co-Investigator                      | CCC19                                                                                      |
| Natasha                           | Edwin            |                       | MD               | ThedaCare Cancer Care                                 | Appleton, WI                             | Participating site principal Investigator               | CCC19                                                                                      |
| Melissa                           | Smits            |                       | APC              | ThedaCare Cancer Care                                 | Appleton, WI                             | Participating site Co-Investigator                      | CCC19                                                                                      |
| Susie                             | Owenby           |                       | RN, CCRP         | Thompson Cancer Survival Center                       | Knoxville, TN                            | Participating site Co-Investigator                      | CCC19                                                                                      |

## Supplemental Online Content: Nonauthor Collaborators

\*Indicates required information. Only first name, last name, and suffix will appear in PubMed.

| *First Name and Middle Initial(s) | *Last Name | *Suffix (eg, Jr, III) | Academic Degrees | Institution                                                                   | Location (city, state/province, country) | Role or Contribution, eg, chair, principal investigator | Group (if more than 1 Group listed in the byline) and/or Subgroup (eg, Steering Committee) |
|-----------------------------------|------------|-----------------------|------------------|-------------------------------------------------------------------------------|------------------------------------------|---------------------------------------------------------|--------------------------------------------------------------------------------------------|
| Deborah B.                        | Doroshov   |                       | MD, PhD          | Tisch Cancer Institute at the Icahn School of Medicine at Mount Sinai         | New York, NY                             | Participating site principal Investigator               | CCC19                                                                                      |
| Matthew D.                        | Galsky     |                       | MD               | Tisch Cancer Institute at the Icahn School of Medicine at Mount Sinai         | New York, NY                             | Participating site Co-Investigator                      | CCC19                                                                                      |
| Michael                           | Wotman     |                       | MD               | Tisch Cancer Institute at the Icahn School of Medicine at Mount Sinai         | New York, NY                             | Participating site Co-Investigator                      | CCC19                                                                                      |
| Huili                             | Zhu        |                       | MD               | Tisch Cancer Institute at the Icahn School of Medicine at Mount Sinai         | New York, NY                             | Participating site Co-Investigator                      | CCC19                                                                                      |
| Alyson                            | Fazio      |                       | APRN-BC          | Tufts Medical Center Cancer Center                                            | Boston and Stoneham, MA                  | Participating site Co-Investigator                      | CCC19                                                                                      |
| Jonathan                          | Riess      |                       | MD, MS           | UC Davis Comprehensive Cancer Center at the University of California at Davis | CA, USA                                  | Participating site principal Investigator               | CCC19                                                                                      |
| Kanishka G.                       | Patel      |                       | MD               | UC Davis Comprehensive Cancer Center at the University of California at Davis | CA, USA                                  | Participating site Co-Investigator                      | CCC19                                                                                      |
| Samuel M.                         | Rubinstein |                       | MD               | UNC Lineberger Comprehensive Cancer Center                                    | Chapel Hill, NC                          | Participating site principal Investigator               | CCC19                                                                                      |
| William A.                        | Wood       |                       | MD, MPH          | UNC Lineberger Comprehensive Cancer Center                                    | Chapel Hill, NC                          | Participating site Co-Investigator                      | CCC19                                                                                      |
| Jessica Yasmine                   | Islam      |                       | PhD, MPH         | UNC Lineberger Comprehensive Cancer Center                                    | Chapel Hill, NC                          | Participating site Co-Investigator                      | CCC19                                                                                      |
| Vaibhav                           | Kumar      |                       | MD               | UNC Lineberger Comprehensive Cancer Center                                    | Chapel Hill, NC                          | Participating site Co-Investigator                      | CCC19                                                                                      |
| Syed A.                           | Ahmad      |                       | MD, FACS         | University of Cincinnati Cancer Center                                        | Cincinnati, OH                           | Participating site Co-Investigator                      | CCC19                                                                                      |
| Punita                            | Grover     |                       | MD               | University of Cincinnati Cancer Center                                        | Cincinnati, OH                           | Participating site Co-Investigator                      | CCC19                                                                                      |
| Shuchi                            | Gulati     |                       | MD               | University of Cincinnati Cancer Center                                        | Cincinnati, OH                           | Participating site Co-Investigator                      | CCC19                                                                                      |



Supplemental Online Content: Nonauthor Collaborators

\*Indicates required information. Only first name, last name, and suffix will appear in PubMed.

| *First Name and Middle Initial(s) | *Last Name  | *Suffix (eg, Jr, III) | Academic Degrees | Institution                                              | Location (city, state/province, country) | Role or Contribution, eg, chair, principal investigator | Group (if more than 1 Group listed in the byline) and/or Subgroup (eg, Steering Committee) |
|-----------------------------------|-------------|-----------------------|------------------|----------------------------------------------------------|------------------------------------------|---------------------------------------------------------|--------------------------------------------------------------------------------------------|
| Jordan                            | Kharofa     |                       | MD               | University of Cincinnati Cancer Center                   | Cincinnati, OH                           | Participating site Co-Investigator                      | CCC19                                                                                      |
| Michelle                          | Marcum      |                       | MS               | University of Cincinnati Cancer Center                   | Cincinnati, OH                           | Participating site Co-Investigator                      | CCC19                                                                                      |
| Daniel W.                         | Bowles      |                       | MD               | University of Colorado Cancer Center                     | Aurora, CO                               | Participating site principal Investigator               | CCC19                                                                                      |
| Christopher L.                    | Geiger      |                       | MD               | University of Colorado Cancer Center                     | Aurora, CO                               | Participating site Co-Investigator                      | CCC19                                                                                      |
| Merry-Jennifer                    | Markham     |                       | MD, FACP, FASCO  | University of Florida Health Cancer Center               | Gainesville, FL                          | Participating site principal Investigator               | CCC19                                                                                      |
| Rohit                             | Bishnoi     |                       | MD               | University of Florida Health Cancer Center               | Gainesville, FL                          | Participating site Co-Investigator                      | CCC19                                                                                      |
| Atlantis D.                       | Russ        |                       | MD, PhD          | University of Florida Health Cancer Center               | Gainesville, FL                          | Participating site Co-Investigator                      | CCC19                                                                                      |
| Chintan                           | Shah        |                       | MD               | University of Florida Health Cancer Center               | Gainesville, FL                          | Participating site Co-Investigator                      | CCC19                                                                                      |
| Jared D.                          | Acoba       |                       | MD               | University of Hawai'i Cancer Center                      | Honolulu, HI                             | Participating site principal Investigator               | CCC19                                                                                      |
| Young Soo                         | Rho         |                       | MD, CM           | University of Hawai'i Cancer Center                      | Honolulu, HI                             | Participating site Co-Investigator                      | CCC19                                                                                      |
| Lawrence E.                       | Feldman     |                       | MD               | University of Illinois Hospital & Health Sciences System | Chicago, IL                              | Participating site principal Investigator               | CCC19                                                                                      |
| Kent F.                           | Hoskins     |                       | MD               | University of Illinois Hospital & Health Sciences System | Chicago, IL                              | Participating site principal Investigator               | CCC19                                                                                      |
| Gerald                            | Gantt       | Jr.                   | MD               | University of Illinois Hospital & Health Sciences System | Chicago, IL                              | Participating site Co-Investigator                      | CCC19                                                                                      |
| Mahir                             | Khan        |                       | MD               | University of Illinois Hospital & Health Sciences System | Chicago, IL                              | Participating site Co-Investigator                      | CCC19                                                                                      |
| Mary                              | Pasquinelli |                       | APN, DNP         | University of Illinois Hospital & Health Sciences System | Chicago, IL                              | Participating site Co-Investigator                      | CCC19                                                                                      |

## Supplemental Online Content: Nonauthor Collaborators

\*Indicates required information. Only first name, last name, and suffix will appear in PubMed.

| *First Name and Middle Initial(s) | *Last Name | *Suffix (eg, Jr, III) | Academic Degrees    | Institution                                                             | Location (city, state/province, country) | Role or Contribution, eg, chair, principal investigator | Group (if more than 1 Group listed in the byline) and/or Subgroup (eg, Steering Committee) |
|-----------------------------------|------------|-----------------------|---------------------|-------------------------------------------------------------------------|------------------------------------------|---------------------------------------------------------|--------------------------------------------------------------------------------------------|
| Candice                           | Schwartz   |                       | MD                  | University of Illinois Hospital & Health Sciences System                | Chicago, IL                              | Participating site Co-Investigator                      | CCC19                                                                                      |
| Praveen                           | Vikas      |                       | MD                  | University of Iowa Holden Comprehensive Cancer Center                   | Iowa City, IA                            | Participating site principal Investigator               | CCC19                                                                                      |
| Christopher R.                    | Friese     |                       | PhD, RN, AOCN, FAAN | University of Michigan Rogel Cancer Center                              | Ann Arbor, MI                            | Participating site principal Investigator               | CCC19                                                                                      |
| Blanche H.                        | Mavromatis |                       | MD                  | UPMC Western Maryland                                                   | Cumberland, MD                           | Participating site principal Investigator               | CCC19                                                                                      |
| Ragneel R.                        | Bijjula    |                       | MD                  | UPMC Western Maryland                                                   | Cumberland, MD                           | Participating site Co-Investigator                      | CCC19                                                                                      |
| Qamar U.                          | Zaman      |                       | MD                  | UPMC Western Maryland                                                   | Cumberland, MD                           | Participating site Co-Investigator                      | CCC19                                                                                      |
| Alex                              | Cheng      |                       | PhD                 | Vanderbilt-Ingram Cancer Center at Vanderbilt University Medical Center | Nashville, TN                            | Participating site Co-Investigator                      | CCC19                                                                                      |
| Elizabeth J.                      | Davis      |                       | MD                  | Vanderbilt-Ingram Cancer Center at Vanderbilt University Medical Center | Nashville, TN                            | Participating site Co-Investigator                      | CCC19                                                                                      |
| Stephany N.                       | Duda       |                       | PhD, MS             | Vanderbilt-Ingram Cancer Center at Vanderbilt University Medical Center | Nashville, TN                            | Participating site Co-Investigator                      | CCC19                                                                                      |
| Kyle T.                           | Enriquez   |                       | MSc, BS             | Vanderbilt-Ingram Cancer Center at Vanderbilt University Medical Center | Nashville, TN                            | Participating site Co-Investigator                      | CCC19                                                                                      |
| Erin A.                           | Gillaspie  |                       | MD, MPH             | Vanderbilt-Ingram Cancer Center at Vanderbilt University Medical Center | Nashville, TN                            | Participating site Co-Investigator                      | CCC19                                                                                      |
| Daniel                            | Hausrath   |                       | MD                  | Vanderbilt-Ingram Cancer Center at Vanderbilt University Medical Center | Nashville, TN                            | Participating site Co-Investigator                      | CCC19                                                                                      |

## Supplemental Online Content: Nonauthor Collaborators

\*Indicates required information. Only first name, last name, and suffix will appear in PubMed.

| *First Name and Middle Initial(s) | *Last Name | *Suffix (eg, Jr, III) | Academic Degrees | Institution                                                             | Location (city, state/province, country) | Role or Contribution, eg, chair, principal investigator       | Group (if more than 1 Group listed in the byline) and/or Subgroup (eg, Steering Committee) |
|-----------------------------------|------------|-----------------------|------------------|-------------------------------------------------------------------------|------------------------------------------|---------------------------------------------------------------|--------------------------------------------------------------------------------------------|
| Chih-Yuan                         | Hsu        |                       | PhD              | Vanderbilt-Ingram Cancer Center at Vanderbilt University Medical Center | Nashville, TN                            | Participating site Co-Investigator                            | CCC19                                                                                      |
| Douglas B.                        | Johnson    |                       | MD, MSCI         | Vanderbilt-Ingram Cancer Center at Vanderbilt University Medical Center | Nashville, TN                            | Participating site Co-Investigator                            | CCC19                                                                                      |
| Xuanyi                            | Li         |                       | BA               | Vanderbilt-Ingram Cancer Center at Vanderbilt University Medical Center | Nashville, TN                            | Participating site Co-Investigator                            | CCC19                                                                                      |
| Brian I.                          | Rini       |                       | MD, FACP, FASCO  | Vanderbilt-Ingram Cancer Center at Vanderbilt University Medical Center | Nashville, TN                            | Participating site Co-Investigator; Steering Committee Member | CCC19                                                                                      |
| David A.                          | Slosky     |                       | MD               | Vanderbilt-Ingram Cancer Center at Vanderbilt University Medical Center | Nashville, TN                            | Participating site Co-Investigator                            | CCC19                                                                                      |
| Yu                                | Shyr       |                       | PhD              | Vanderbilt-Ingram Cancer Center at Vanderbilt University Medical Center | Nashville, TN                            | Participating site Co-Investigator                            | CCC19                                                                                      |
| Carmen C.                         | Solorzano  |                       | MD, FACS         | Vanderbilt-Ingram Cancer Center at Vanderbilt University Medical Center | Nashville, TN                            | Participating site Co-Investigator                            | CCC19                                                                                      |
| Tianyi                            | Sun        |                       | MS               | Vanderbilt-Ingram Cancer Center at Vanderbilt University Medical Center | Nashville, TN                            | Participating site Co-Investigator                            | CCC19                                                                                      |
| Matthew D.                        | Tucker     |                       | MD               | Vanderbilt-Ingram Cancer Center at Vanderbilt University Medical Center | Nashville, TN                            | Participating site Co-Investigator                            | CCC19                                                                                      |
| Karen                             | Vega-Luna  |                       | MA               | Vanderbilt-Ingram Cancer Center at Vanderbilt University Medical Center | Nashville, TN                            | Participating site Co-Investigator                            | CCC19                                                                                      |

## Supplemental Online Content: Nonauthor Collaborators

\*Indicates required information. Only first name, last name, and suffix will appear in PubMed.

| *First Name and Middle Initial(s) | *Last Name | *Suffix (eg, Jr, III) | Academic Degrees  | Institution                                                             | Location (city, state/province, country) | Role or Contribution, eg, chair, principal investigator | Group (if more than 1 Group listed in the byline) and/or Subgroup (eg, Steering Committee) |
|-----------------------------------|------------|-----------------------|-------------------|-------------------------------------------------------------------------|------------------------------------------|---------------------------------------------------------|--------------------------------------------------------------------------------------------|
| Lucy L.                           | Wang       |                       | BA                | Vanderbilt-Ingram Cancer Center at Vanderbilt University Medical Center | Nashville, TN                            | Participating site Co-Investigator                      | CCC19                                                                                      |
| Matthew                           | Puc        |                       | MD                | Virtua Health, Marlton                                                  | NJ, USA                                  | Participating site principal Investigator               | CCC19                                                                                      |
| Theresa M.                        | Carducci   |                       | MSN, RN, CCRP     | Virtua Health, Marlton                                                  | NJ, USA                                  | Participating site Co-Investigator                      | CCC19                                                                                      |
| Karen J.                          | Goldsmith  |                       | BSN, RN           | Virtua Health, Marlton                                                  | NJ, USA                                  | Participating site Co-Investigator                      | CCC19                                                                                      |
| Susan                             | Van Loon   |                       | RN, CTR, CCRP     | Virtua Health, Marlton                                                  | NJ, USA                                  | Participating site Co-Investigator                      | CCC19                                                                                      |
| Umit                              | Topaloglu  |                       | PhD, FAMIA        | Wake Forest Baptist Comprehensive Cancer Center                         | Winston-Salem, NC                        | Participating site principal Investigator               | CCC19                                                                                      |
| Saif I.                           | Alimohamed |                       | MD                | Wake Forest Baptist Comprehensive Cancer Center                         | Winston-Salem, NC                        | Participating site Co-Investigator                      | CCC19                                                                                      |
| Robert L.                         | Rice       |                       | MD, PhD           | WellSpan Health                                                         | York, PA                                 | Participating site principal Investigator               | CCC19                                                                                      |
| Wilhelmina D.                     | Cabalona   |                       | MD                | Wentworth-Douglass Hospital                                             | Dover, NH                                | Participating site principal Investigator               | CCC19                                                                                      |
| Christine                         | Pilar      |                       | BS, CCRC, ACRP-PM | Wentworth-Douglass Hospital                                             | Dover, NH                                | Participating site Co-Investigator                      | CCC19                                                                                      |
| Prakash                           | Peddi      |                       | MD                | Willis-Knighton Cancer Center                                           | Shreveport, LA                           | Participating site principal Investigator               | CCC19                                                                                      |
| Lane R.                           | Rosen      |                       | MD                | Willis-Knighton Cancer Center                                           | Shreveport, LA                           | Participating site principal Investigator               | CCC19                                                                                      |
| Briana Barrow                     | McCullough |                       | BSc, CCRC         | Willis-Knighton Cancer Center                                           | Shreveport, LA                           | Participating site Co-Investigator                      | CCC19                                                                                      |
| Navid                             | Hafez      |                       | MD, MPH           | Yale Cancer Center at Yale University School of Medicine                | New Haven, CT                            | Participating site principal Investigator               | CCC19                                                                                      |
| Roy                               | Herbst     |                       | MD, PhD           | Yale Cancer Center at Yale University School of Medicine                | New Haven, CT                            | Participating site Co-Investigator                      | CCC19                                                                                      |

## Supplemental Online Content: Nonauthor Collaborators

\*Indicates required information. Only first name, last name, and suffix will appear in PubMed.

| *First Name and Middle Initial(s) | *Last Name    | *Suffix (eg, Jr, III) | Academic Degrees | Institution                                              | Location (city, state/province, country) | Role or Contribution, eg, chair, principal investigator | Group (if more than 1 Group listed in the byline) and/or Subgroup (eg, Steering Committee) |
|-----------------------------------|---------------|-----------------------|------------------|----------------------------------------------------------|------------------------------------------|---------------------------------------------------------|--------------------------------------------------------------------------------------------|
| Patricia                          | LoRusso       |                       | DO, PhD          | Yale Cancer Center at Yale University School of Medicine | New Haven, CT                            | Participating site Co-Investigator                      | CCC19                                                                                      |
| Tyler                             | Masters       |                       | MS               | Yale Cancer Center at Yale University School of Medicine | New Haven, CT                            | Participating site Co-Investigator                      | CCC19                                                                                      |
| Catherine                         | Stratton      |                       | BA               | Yale Cancer Center at Yale University School of Medicine | New Haven, CT                            | Participating site Co-Investigator                      | CCC19                                                                                      |
| Daniel G.                         | Stover        |                       | MD               | The Ohio State University Comprehensive Cancer Center    | Columbus, OH                             | Participating site principal Investigator               | CCC19                                                                                      |
| Daniel                            | Addison       |                       | MD               | The Ohio State University Comprehensive Cancer Center    | Columbus, OH                             | Participating site Co-Investigator                      | CCC19                                                                                      |
| James L.                          | Chen          |                       | MD               | The Ohio State University Comprehensive Cancer Center    | Columbus, OH                             | Participating site Co-Investigator                      | CCC19                                                                                      |
| Margaret E.                       | Gatti-Mays    |                       | MD               | The Ohio State University Comprehensive Cancer Center    | Columbus, OH                             | Participating site Co-Investigator                      | CCC19                                                                                      |
| Sachin R.                         | Jhavar        |                       | MD               | The Ohio State University Comprehensive Cancer Center    | Columbus, OH                             | Participating site Co-Investigator                      | CCC19                                                                                      |
| Vidhya                            | Karivedu      |                       | MBBS             | The Ohio State University Comprehensive Cancer Center    | Columbus, OH                             | Participating site Co-Investigator                      | CCC19                                                                                      |
| Maryam B.                         | Lustberg      |                       | MD, MPH          | The Ohio State University Comprehensive Cancer Center    | Columbus, OH                             | Participating site Co-Investigator                      | CCC19                                                                                      |
| Joshua D.                         | Palmer        |                       | MD               | The Ohio State University Comprehensive Cancer Center    | Columbus, OH                             | Participating site Co-Investigator                      | CCC19                                                                                      |
| Clement                           | Pillainayagam |                       | MD               | The Ohio State University Comprehensive Cancer Center    | Columbus, OH                             | Participating site Co-Investigator                      | CCC19                                                                                      |
| Sarah                             | Wall          |                       | MD               | The Ohio State University Comprehensive Cancer Center    | Columbus, OH                             | Participating site Co-Investigator                      | CCC19                                                                                      |
| Nicole                            | Williams      |                       | MD               | The Ohio State University Comprehensive Cancer Center    | Columbus, OH                             | Participating site Co-Investigator                      | CCC19                                                                                      |

## Supplemental Online Content: Nonauthor Collaborators

\*Indicates required information. Only first name, last name, and suffix will appear in PubMed.

| *First Name and Middle Initial(s) | *Last Name | *Suffix (eg, Jr, III) | Academic Degrees | Institution                                                                                    | Location (city, state/province, country) | Role or Contribution, eg, chair, principal investigator | Group (if more than 1 Group listed in the byline) and/or Subgroup (eg, Steering Committee) |
|-----------------------------------|------------|-----------------------|------------------|------------------------------------------------------------------------------------------------|------------------------------------------|---------------------------------------------------------|--------------------------------------------------------------------------------------------|
| Vadim S.                          | Koshkin    |                       | MD               | Helen Diller Family Comprehensive Cancer Center, the University of California at San Francisco | San Francisco, CA                        | Participating site Co-Investigator                      | CCC19                                                                                      |
| Daniel H.                         | Kwon       |                       | MD               | Helen Diller Family Comprehensive Cancer Center, the University of California at San Francisco | San Francisco, CA                        | Participating site Co-Investigator                      | CCC19                                                                                      |
| Solange                           | Peters     |                       | MD-PhD           | Lausanne University Hospital                                                                   | Lausanne, Switzerland                    | Steering Committee Member                               | CCC19                                                                                      |
